# Supplementary material for: NPR-A regulates self-renewal and pluripotency of embryonic stem cells
Source: PubMed Central journal article supplement — Cell Death Dis. 2011 Mar 10;2(3):e127–. doi: 10.1038/cddis.2011.10 (PMC3101807; doi:10.1038/cddis.2011.10), 2011-03-10
Supplement: cddis201110x1.pdf [file cddis201110x1.pdf]

## Supplementary Figure 1

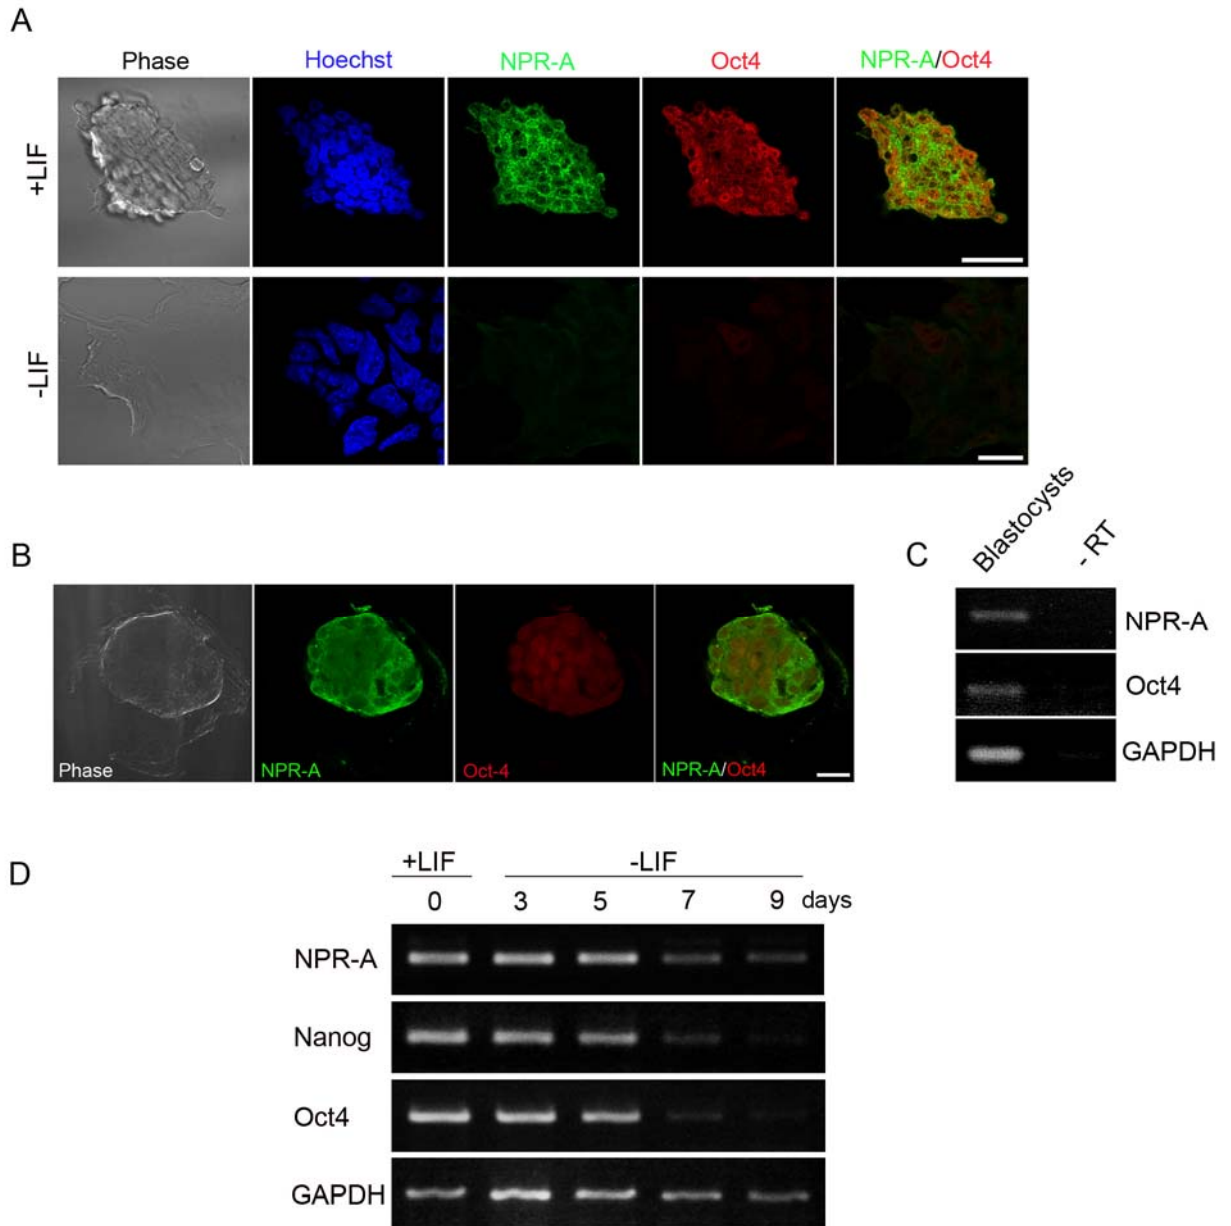

**Supplementary Figure 1.** Expression of NPR-A in murine ES cells, pre-implantation embryos and during ES cell differentiation. (A) Double-immunofluorescence images of ES cells cultured with (+) leukemia inhibitory factor (LIF) in the ES cell medium (*upper panels*) or without (-) LIF for 5 days in the differentiation medium (*lower panels*), stained with antibodies against the ES cell marker Oct4 and NPR-A. Note that the differentiated

(Oct4-negative) cells are also negative for NPR-A. (B) Double-immunofluorescence images of 3.5-day-old blastocysts stained with antibodies against NPR-A and Oct-4. (C) RT-PCR analysis of the mRNA levels of NPR-A and Oct4 in 3.5-day-old blastocysts. (– RT) indicates PCR reaction carried out using samples without reverse transcriptase. (D) RT-PCR analysis of the mRNA levels of NPR-A and pluripotency factors (Oct4 and Nanog) during embryoid bodies (EBs) formation. ES cells were differentiated *in vitro* by culturing in hanging drops to form EBs. Scale bars = 20  $\mu\text{m}$ .
