# Supplementary material for: NPR-A regulates self-renewal and pluripotency of embryonic stem cells
Source: PubMed Central journal article supplement — Cell Death Dis. 2011 Mar 10;2(3):e127–. doi: 10.1038/cddis.2011.10 (PMC3101807; doi:10.1038/cddis.2011.10), 2011-03-10
Supplement: cddis201110x3.pdf [file cddis201110x3.pdf]

Supplementary Figure 3

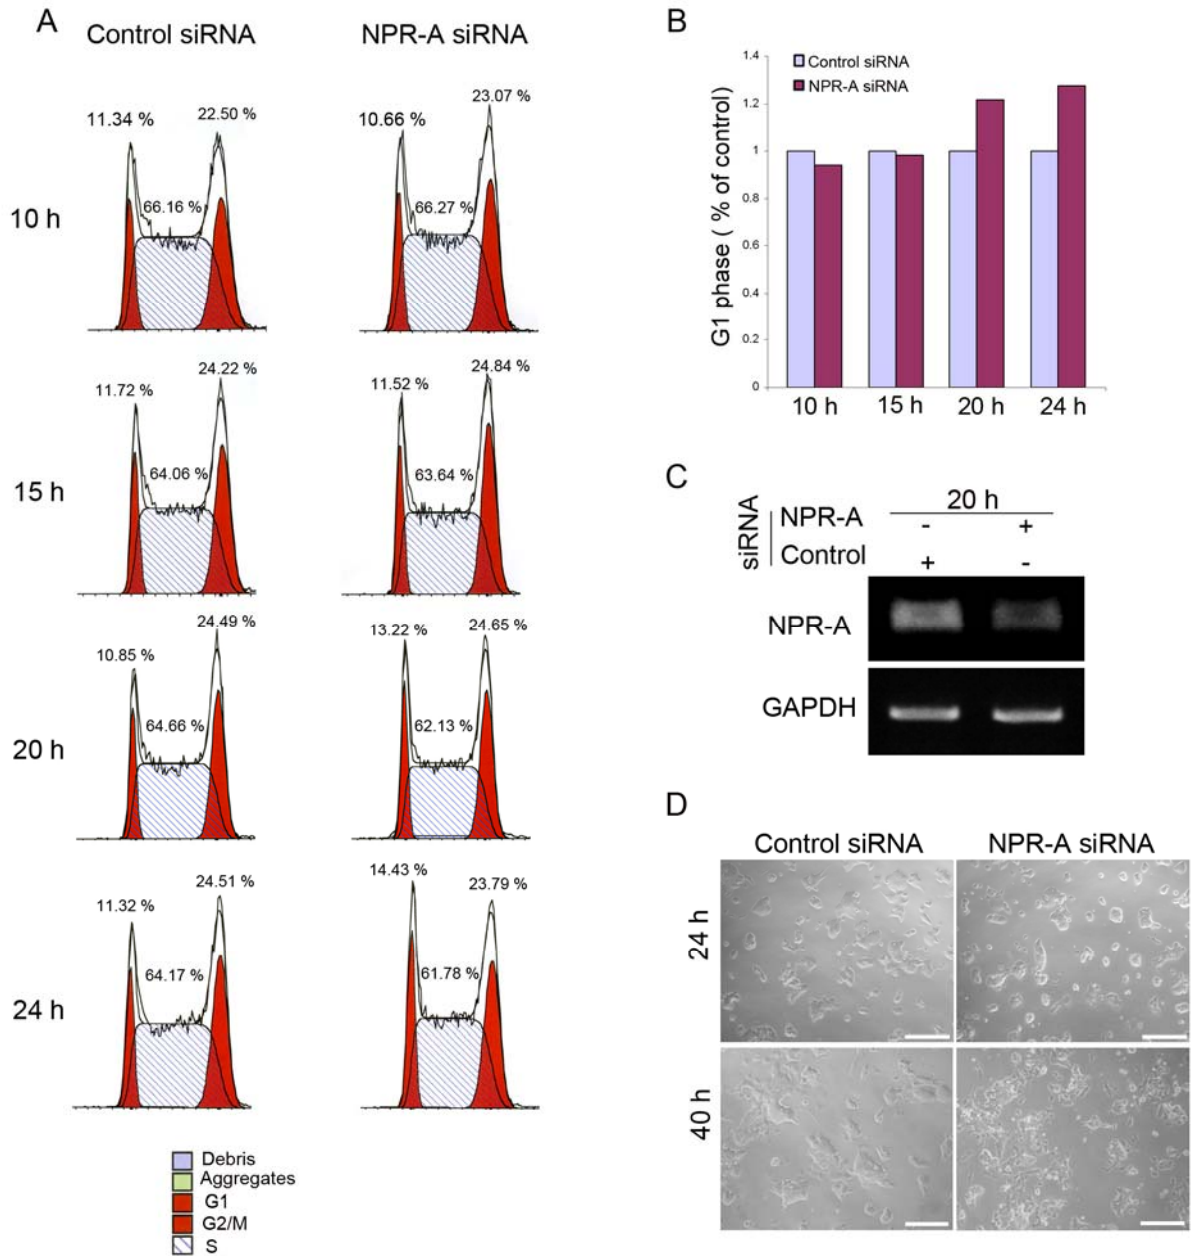

**Supplementary Figure 3.** Effect of NPR-A knockdown on the G1-S transition of the cell cycle in murine ES cells. (A) Cell cycle profiles were analyzed by propidium iodide staining and flow cytometry after the time period indicated. The percentages of cells in G1, S, and G2/M phases of cell cycle are shown. (B) Quantification of G1-phase of the

cell cycle. (C) RT-PCR analysis of NPR-A mRNA 20 hours after ES cell transfection with the control siRNA or NPR-A siRNA. (D) Morphology of ES cells treated with control siRNA or NPR-A siRNAs at time period indicated. Scale bar = 50  $\mu$ m.
