# Supplementary material for: NPR-A regulates self-renewal and pluripotency of embryonic stem cells
Source: PubMed Central journal article supplement — Cell Death Dis. 2011 Mar 10;2(3):e127–. doi: 10.1038/cddis.2011.10 (PMC3101807; doi:10.1038/cddis.2011.10), 2011-03-10
Supplement: cddis201110x5.pdf [file cddis201110x5.pdf]

**Supplementary Table 1: Primers used for RT-PCR and Real-time PCR**

| <b>Gene</b> | <b>Sequence</b>              |
|-------------|------------------------------|
| NPR-A       | F: AGTACGCCAACAACCTGGAG      |
|             | R: AAGAGCTGTAAAGCCCACGA      |
| ANP         | F: CAGCATGGGCTCCTTCTCCA      |
|             | R: TCCACTCTGGGCTCCAATCCT     |
| Oct4        | F: GGATGCTGTGAGCCAAGG        |
|             | R: GAACAAAATGATGAGTGACAGACAG |
| Nanog       | F: CACCCACCCATGCTAGTCTT      |
|             | R: ACCCTCAAACCTCCTGGTCCT     |
| Sox2        | F: AAGGGTTCTTGCTGGGTTTT      |
|             | R: AGACCACGAAAACGGTCTTG      |
| GATA4       | F: CTGTCATCTCACTATGGGCA      |
|             | R: CCAAGTCCGAGCAGGAATTT      |
| GATA6       | F: GAGCTGGTGCTACCAAGAGG      |
|             | R: TGCAAAAGCCCATCTCTTCT      |
| Brachyury   | F: CCTCCCTTGTTGCCTTAGAGTAGTT |
|             | R: GCAGATTGTCTTTGGCTACTTTGTC |
| AFP         | F: CCTATGCCCTCCCCATTC        |
|             | R: CTCACACCAAAGAGTCAACACATT  |
| Nestin      | F: GGAGAGTCGCTTAGAGGTGC      |
|             | R: TCAGGAAAGCCAAGAGAAGC      |
| Cdx2        | F: AAACCTGTGCGAGTGGATG       |
|             | R: CTGCGGTTCTGAAACCAAAT      |
| Cdx2        | R: CAGTCCCTAGGAAGCCAAGTGAAA  |
|             | R: AAGTGAAACTCCTTCTCCAGCTCC  |

|                |                              |
|----------------|------------------------------|
| Hand1          | F: AAGGATGCACAAGCAGGTGAC     |
|                | R: TTAAATCCTCTTCTCGCCGGG     |
| Eomes          | F: CCTGGTGGTGTTTTGTTGTG      |
|                | R: TTAAATAGCACCGGGCACTC      |
| p21            | F: CCCTCTATTTTGGAGGGTTAATCT  |
|                | R: GTACCCTGCATATACATTCCCTTC  |
| Cyclin D1      | F: TCTACTGACA ACTCTATCCG     |
|                | R: TAGCAGGAGAGGAAGTTGTTGG    |
| $\beta$ -actin | F: TGGTGGGTATGGGTCAGAAGGACTC |
|                | R: CATGGCTGGGGTGTTGAAGGTCTCA |
| GAPDH          | F: GGCATTGTGGAAGGGCTCA       |
|                | R: TCCACCACCCTGTTGCTGT       |
